# Supplementary material
Source: bioRxiv or medRxiv preprint supplement (https://www.medrxiv.org/highwire/filestream/84808/field_highwire_adjunct_files/0/2020.06.05.20123042-1.pdf)
Supplement: Supplementary file [file 2020.06.05.20123042-1.pdf]

# QUESTIONNAIRE

## STUDY TITLE:

### THE ERA OF CORONAVIRUS; KNOWLEDGE, ATTITUDE, PRACTICES AND BARRIERS TO HAND HYGIENE AMONG MAKERERE UNIVERSITY STUDENTS AND KATANGA COMMUNITY RESIDENTS.

Participant's Code:

|   |   |   |  |  |  |
|---|---|---|--|--|--|
| K | A | P |  |  |  |
|---|---|---|--|--|--|

The questionnaire has 20 questions and will take about 20-30 minutes to answer.

### **Demographics**

1) Age ..... (in completed years)

2) Sex

- A. Male
- B. Female

(3). For students; Association to Makerere university?

- A. MakCHS; specify year of study .....
- B. NON MakCHS; specify year of study .....

(4) If a katanga resident,

- I. highest level of education
  - A. Primary
  - B. Secondary
  - C. Tertiary
  - D. None

5) Religion

- a) Roman Catholic
- b) Anglican
- c) Muslim
- d) Born Again
- e) Others, specify; .....

**Knowledge**

(6). When should Hand- washing be done? (tick appropriate)

- A. After coughing or Sneezing or after blowing the nose
- B. Before, during and after you prepare food
- C. When caring for the sick
- D. After handling animals or animal wastes
- E. After touching surfaces like money
- F. After visiting markets, using public transport
- G. After visiting the toilet

(7). Do you about the alcohol-based hand rub?

- a) Yes
- b) No

(8). Mark True (T) of False (F) for the following statement on alcohol-based hand rub and hand washing with soap and water;

Hand rubbing is more effective against germs than hand washing .....

(9). What is the minimum time needed for alcohol based hand rub to kill most germs on your hands?

- A. 5 seconds
- B. 20 seconds
- C. 1 minute
- D. I dont know

(10). I have sufficient knowledge about hand hygiene

- A. Strongly Agree
- B. Agree
- C. Neutral
- D. Disagree
- E. Strongly disagree

(11). What is your main source of information about COVID19 prevention?

- A. Newspapers
- B. Television
- C. Social media
- D. Radio
- E. Friends and Family
- F. Others

**Attitude on hand hygiene among the Makerere University students and Community**

(12). I adhere to correct hand hygiene practices at all times

- A. Strongly Agree
- B. Agree
- C. Neutral
- D. Disagree
- E. Strongly disagree

(13). I feel guilty if I omit hand washing

- A. Strongly Agree
- B. Agree
- C. Neutral
- D. Disagree
- E. Strongly disagree

(14). I practice good hand hygiene?

- A. Strongly Agree
- B. Agree
- C. Neutral
- D. Disagree
- E. Strongly disagree

**Practices of hand hygiene.**

(15) . The frequency of hand hygiene required makes it difficult for me to carry it out as often as necessary

- A. Strongly Agree
- B. Agree
- C. Neutral
- D. Disagree
- E. Strongly disagree

(16). How do you greet?

1. Hand shake
2. Hungs
3. Elbow bump
4. Head nood
5. Feet bump
6. Only words and facial expressions

(17). My friends and peers have a positive influence on my hand hygiene

- A. Strongly Agree
- B. Agree
- C. Neutral
- D. Disagree
- E. Strongly disagree

(18) . Have you received any teaching on hand hygiene?

- A. Yes
- B. No

If yes,

I. When was this?

- A. <5 days
- B. <30 days
- C. < 3 months
- D. > 3 months

II. Who delivered the teaching?

- A. A health worker
- B. A friend
- C. A volunteer
- D. Others Specify

(19). Which is the recommended process for hand washing technique? (Request Participants demonstrate)

All 7 steps in order

7 steps in wrong order

3-6 steps

< 3 steps

## **Barriers to hand Hygiene**

(20). Which of the following is a barrier to good hand hygiene in your setting? (tick all appropriate)

- A. Lack of running water
- B. Lack of soaps, antiseptics, detergents and alcohol sanitizers
- C. Lack of awareness or knowledge on hand hygiene importance
- D. Negligence as a barrier to hand hygiene compliance
- E. A lot of work, I can't find time to wash hands
- F. Poor personal habit
